# Supplementary material for: Regulation of STEP61 and tyrosine-phosphorylation of NMDA and AMPA receptors during homeostatic synaptic plasticity
Source: PubMed Central journal article supplement (PMC4578242; doi:10.1186/s13041-015-0148-4), 2015-09-22

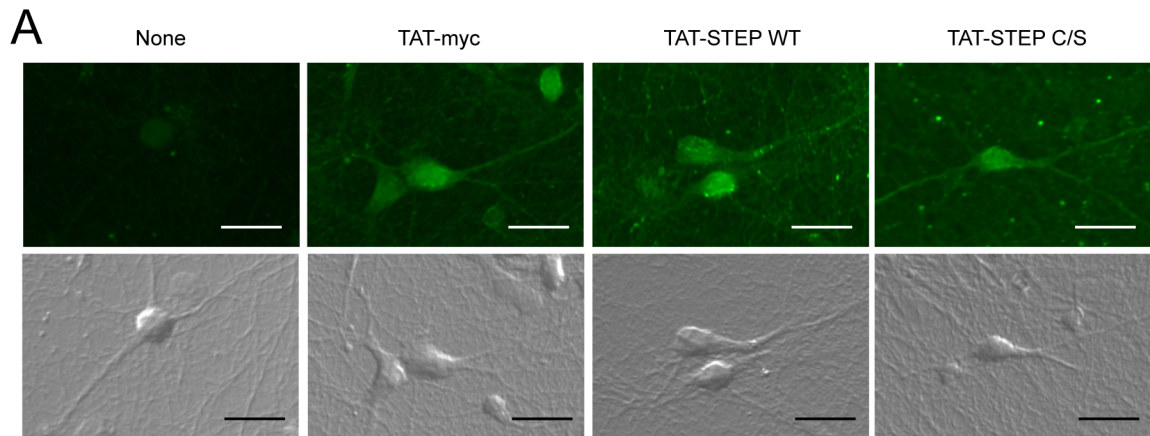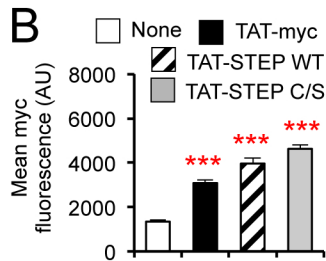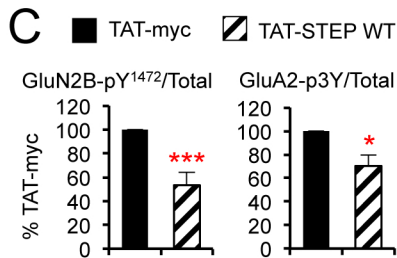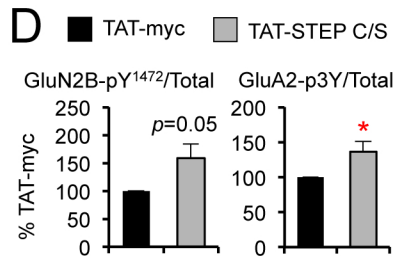

Supplement: 13041_2015_148_MOESM1_ESM.pdf [file 13041_2015_148_MOESM1_ESM.pdf]
